# Supplementary material for: A double-blind, non-inferiority RCT comparing corifollitropin alfa and recombinant FSH during the first seven days of ovarian stimulation using a GnRH antagonist protocol
Source: PubMed Central journal article supplement — Hum Reprod. 2009 Aug 14;24(12):3063–72. doi: 10.1093/humrep/dep291 (PMC2777786; doi:10.1093/humrep/dep291), 2009-08-14
Supplement: dep291_1.pdf [file dep291_1.pdf]

**Number of cumulus-oocyte-complexes per attempt: ANOVA results  
Intent-to-Treat and Per Protocol group.**

|                                                 |                      | 150 µg Org 36286 - 200 IU recFSH |            |
|-------------------------------------------------|----------------------|----------------------------------|------------|
|                                                 |                      | ITT                              | PP         |
| Number of cumulus-oocyte-complexes, per attempt | Treatment difference | 1.2                              | 1.2        |
|                                                 | 95% CI               | [0.5; 1.9]                       | [0.5; 2.0] |

**Ongoing pregnancy rate: summary statistics  
Intent-to-Treat and Per Protocol group.**

|                   |                     | ITT                                       |                                     | PP                                        |                                     |
|-------------------|---------------------|-------------------------------------------|-------------------------------------|-------------------------------------------|-------------------------------------|
|                   |                     | 150 µg Org<br>36286<br>(N=756)<br>N n (%) | 200 IU recFSH<br>(N=750)<br>N n (%) | 150 µg Org<br>36286<br>(N=739)<br>N n (%) | 200 IU recFSH<br>(N=733)<br>N n (%) |
| Ongoing pregnancy | Per attempt         | 756 294 (38.9)                            | 750 286 (38.1)                      | 739 291 (39.4)                            | 733 282 (38.5)                      |
|                   | Per embryo transfer | 672 294 (43.8)                            | 704 286 (40.6)                      | 659 291 (44.2)                            | 687 282 (41.0)                      |

n = number of subjects with an ongoing pregnancy, i.e. with at least one fetus with heart activity at least 10 weeks after ET; N = the total number of subjects.

**Number of cumulus-oocyte-complexes: summary statistics  
Intent-to-Treat and Per Protocol group.**

|                                                  |                | ITT                            |                             | PP                             |                             |
|--------------------------------------------------|----------------|--------------------------------|-----------------------------|--------------------------------|-----------------------------|
|                                                  |                | 150 µg Org<br>36286<br>(N=756) | 200 IU<br>recFSH<br>(N=750) | 150 µg Org<br>36286<br>(N=739) | 200 IU<br>recFSH<br>(N=733) |
| Number of cumulus-oocytes-complexes, per attempt | n              | 756                            | 750                         | 739                            | 733                         |
|                                                  | Mean (SD)      | 13.7 (8.2)                     | 12.5 (6.7)                  | 13.7 (8.2)                     | 12.6 (6.8)                  |
|                                                  | Median (range) | 13.0 (0, 65)                   | 12.0 (0, 39)                | 13.0 (0, 65)                   | 12.0 (0, 39)                |
| Number of cumulus-oocytes-complexes, per stage * | n              | 732                            | 742                         | 716                            | 725                         |
|                                                  | Mean (SD)      | 14.1 (7.9)                     | 12.7 (6.7)                  | 14.2 (8.0)                     | 12.7 (6.7)                  |
|                                                  | Median (range) | 13.0 (0, 65)                   | 12.0 (0, 39)                | 13.0 (0, 65)                   | 12.0 (0, 39)                |

\* = Restricted to subjects with oocyte retrieval.

n = the number of subjects with data; N = the total number of subjects.
